1 **Research Article**

2 **Public awareness and support for use of wastewater for SARS-CoV-2 monitoring: A**  
3 **community survey in Louisville, Kentucky**

4  
5 Rochelle H. Holm<sup>a</sup>, J. Michael Brick<sup>b</sup>, Alok R. Amraotkar<sup>a</sup>, Joy L. Hart<sup>a,c</sup>, Anish Mukherjee<sup>d</sup>, Jacob  
6 Zeigler<sup>a</sup>, Adrienne M. Bushau-Sprinkle<sup>e</sup>, Lauren B. Anderson<sup>a,f</sup>, Kandi L. Walker<sup>a,c</sup>, Daymond  
7 Talley<sup>g</sup>, Rachel J. Keith<sup>a</sup>, Shesh N. Rai<sup>a,d,h,i</sup>, Kenneth E. Palmer<sup>e,j</sup>, Aruni Bhatnagar<sup>a</sup>, and Ted  
8 Smith<sup>a\*</sup>

9  
10 <sup>a</sup>Christina Lee Brown Envirome Institute, School of Medicine, University of Louisville, 302 E.  
11 Muhammad Ali Blvd., Louisville, KY 40202, United States

12 <sup>b</sup>Westat, Inc., 1600 Research Blvd., Rockville, MD 20850, United States

13 <sup>c</sup>Department of Communication, College of Arts and Sciences, University of Louisville, 2010 S.  
14 Avery Court Walk, Louisville, KY 40208, United States

15 <sup>d</sup>Department of Bioinformatics and Biostatistics, School of Public Health and Information  
16 Science, University of Louisville, 505 S. Hancock St., Louisville, KY 40202, United States

17 <sup>e</sup>Center for Predictive Medicine for Biodefense and Emerging Infectious Diseases, University of  
18 Louisville, 505 S. Hancock St., Louisville, KY 40202, United States

19 <sup>f</sup>Center for Healthy Air Water and Soil, University of Louisville, 302 E. Muhammad Ali Blvd.,  
20 Louisville, KY 40202, United States

21 <sup>g</sup>Louisville/Jefferson County Metropolitan Sewer District, Morris Forman Water Quality  
22 Treatment Center, 4522 Algonquin Parkway, Louisville, KY 40211, United States

23 <sup>h</sup>Brown Cancer Center, School of Medicine, University of Louisville, 505 S. Hancock St.,  
24 Louisville, KY 40202, United States

25 <sup>i</sup>Center for Integrative Environmental Health Sciences, 500 S. Preston St., Louisville, KY 40202,  
26 United States

27 <sup>j</sup>Department of Pharmacology and Toxicology, School of Medicine, University of Louisville, 323  
28 E. Chestnut St., Louisville, KY 40202, United States

29

30

31

32 \*Corresponding author: Ted Smith (ted.smith@louisville.edu)

33

34

35

36

37

38 **Abstract**

39 The majority of sewer systems in the United States and other countries, are operated by public  
40 utilities. In the absence of any regulation, public perception of monitoring wastewater for  
41 population health biomarkers is an important consideration for a public utility commission  
42 when allocating resources for this purpose. In August 2021, we conducted a survey as part of an  
43 ongoing COVID-19 community prevalence study in Louisville/Jefferson County, KY. The survey  
44 comprised of seven questions about awareness of and privacy concerns and was sent to 32,000  
45 households randomly distributed within the county. A total of 1,220 sampled adults  
46 participated in the probability sample, and 981 were used in analysis. A total of 2,444 adults  
47 additionally responded in the convenience sample, and 1,751 were used in analysis. The  
48 samples were weighted to produce estimates representative of all adults in the county. Public  
49 awareness of tracking COVID-19 virus in the sewers was low. Opinions about how data from  
50 this activity are shared strongly supported public disclosure of monitoring results. Responses  
51 showed more support for measuring the largest areas (>30,000 to 50,000 households) typically  
52 representing population levels found in a community or regional wastewater treatment plant.  
53 Those who had a history of COVID-19 infection were more likely to support highly localized  
54 monitoring. Understanding wastewater surveillance strategies and thresholds of privacy  
55 concerns requires in-depth, comprehensive analysis of public opinion for continued success and  
56 efficacy of public health monitoring.

57

58 **Keywords:** COVID-19; community health; sewer; public opinion; wastewater based  
59 epidemiology

60 **Graphic for Table of Contents (TOC)/Abstract Art**

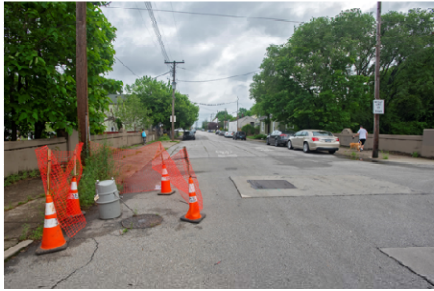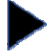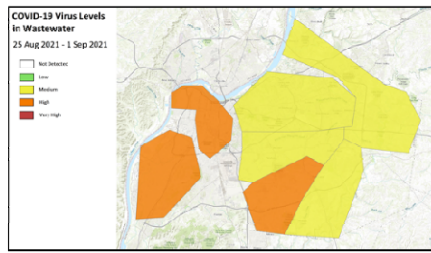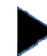

**Public opinion:**

- Low awareness
- Strong support for public disclosure of results
- More support for catchments measuring >30,000-50,000 households

61

62

63

64

65

66

67       **1. Introduction**

68    The Coronavirus Disease 2019 (COVID-19) pandemic has brought to fore monitoring an  
69    individual’s health status related to severe acute respiratory syndrome coronavirus 2 (SARS-  
70    CoV-2) infection or vaccination. Rapid testing for the presence of the virus in the  
71    nasopharyngeal cavity and the presence of viral antigens and ant-viral antibodies in the blood  
72    have been repeatedly and widely employed. Such testing has been variably effective in  
73    preventing infections, which are primarily spread through aerosols and contaminated fluids.  
74    Additionally, individuals infected with SARS-CoV-2 also shed the virus in their stool. Therefore,  
75    rates of infection could also be estimated in the wastewater by anonymously quantifying SARS-  
76    CoV-2 genetic material in fecal matter from infected individuals who reside within an area with  
77    a piped sewer network. Abundance of the virus in wastewater has been shown to trend with  
78    infection levels measured clinically (Wu et al., 2020; Hoffmann and Alsing, 2021; Pecson et al.,  
79    2021). Globally, over 200 universities, at 2,000 sites, within 50 countries are monitoring  
80    wastewater for SARS-CoV-2 RNA (COVIDPoops19, 2021). Wastewater monitoring in the United  
81    States is being conducted by private and government laboratories, as well as academic  
82    partners; the work initiated by the United States Department of Health and Human Services  
83    alone covered wastewater SARS-CoV-2 monitoring of one-third of the US population across 42  
84    states (Smith et al., 2021). In the United States, the Centers for Disease Control and Prevention  
85    operates a national wastewater surveillance system with SARS-CoV-2 results from which are  
86    available only to state public health officials (Centers for Disease Control and Prevention, 2021).  
87    Commercial laboratories such as Biobot Analytics have also published a national dashboard of  
88    results covering data from participating communities (<https://biobot.io/data/>; Biobot Analytics,

89 Inc., 2021). Although there are ongoing legal and ethical discussions around wastewater  
90 monitoring (Gable et al., 2020; Coffman et al., 2021; Hrudehy et al., 2021), the perceptions and  
91 understandings of community members whose wastewater is being monitored for SARS-CoV-2  
92 are unknown. This information is important for future and continued application of wastewater  
93 monitoring because a majority of the sewer systems in the United States, and many other  
94 countries, are operated by public utilities. Without clearly formulated regulation, it is difficult to  
95 convince these utilities to participate in this type of sampling. In this context, public perception  
96 is an important factor that a public utility commission may need to consider when allocating  
97 resources for this purpose.

98

99 The aim of this study is to report findings on public awareness and support of SARS-CoV-2  
100 monitoring in community wastewater from a statistically representative sample of residents in  
101 Louisville/Jefferson County, Kentucky, United States. As this line of community monitoring  
102 continues to develop, the results may inform a wider understanding of how community  
103 members monitored through an existing sewer infrastructure view public health monitoring,  
104 which may influence future approaches for disclosure and consent for wastewater surveillance  
105 and epidemiological modeling.

106

107

108        **2. Methods**

109        This study was part of a larger research project: the *Co-Immunity Project Phase II-Stratified*  
110        *Randomized Testing for COVID-19 Infection and Immunity in Jefferson County, KY, USA*. Study  
111        participants were 18 years and above and residents of Louisville/Jefferson County, Kentucky,  
112        United States. One group of participants was invited to enroll in the study by a postal mailing  
113        and was given an online code to consent and complete a battery of online surveys and then a  
114        few days later participated in clinical testing. This group is referred to as the probability sample.  
115        As a public service, the study was also open to all residents 18 years and older of  
116        Louisville/Jefferson County. This second group of participants, which enrolled without being  
117        invited via mail, is referred to as the convenience sample. Inclusion of the convenience sample  
118        offered a different type of population for study, and also provided an additional testing capacity  
119        for the county. The consenting and data collection procedures were identical for both  
120        probability and convenience sampling. All study participants were directed to an IRB-approved  
121        Health Insurance Portability and Accountability Act of 1996 (HIPAA) compliant secure website,  
122        where they were able to provide online signed consent, complete questionnaires, and schedule  
123        their testing appointment. Each participant provided responses to a total of 104 questions,  
124        including demographic questions, occupational information, contact and risk assessment,  
125        health history, lifestyle, COVID-19 vaccination questions, and the wastewater monitoring  
126        community survey. For this work, only demographic, COVID-19 antibody status and wastewater  
127        monitoring community survey results are reported for a single wave of this serial testing.

128

129

130        2.1. Data collection instrument

131        The wastewater monitoring community survey is presented in Supplement A. The survey was  
132        designed to assess the level of awareness of wastewater surveillance as a part of the COVID-19  
133        pandemic public health response within Louisville/Jefferson County and to learn public  
134        preferences regarding how wastewater based epidemiology should be conducted. Of particular  
135        focus was the size of sewage catchment area that residents believed was appropriate for this  
136        type of health surveillance. The sewer catchment sizes, expressed as the number of households  
137        pooled in a sample, in the survey responses represented the full range of catchment areas that  
138        have been implemented in Louisville/Jefferson County (Yeager et al., 2021).

139

140        2.2. Serological assessment

141        Full methodological details for serological assessment of SARS-CoV-2 infection from this study  
142        have been recently published by Hamorsky et al. (2021). We used the antibody results from  
143        serological positivity for nucleocapsid immunoglobulin G (N-IgG) to identify participants with  
144        previous SARS-CoV-2 infection. Vaccinated respondents should not be positive for N-IgG  
145        because current COVID-19 vaccines used in the studied areas rely only on the SARS-CoV-2 viral  
146        spike protein as the immunogen.

147

148

149        2.3. Probability sampling

150        For the probability sample, households were contacted such that one adult within the  
151        household was randomly selected to participate. All households in Louisville/Jefferson County  
152        were stratified into 8 sectors roughly proportional to the sector size (population) based on the  
153        census block group of the address, where the area corresponded to sewer catchment areas  
154        (community sites and treatment plants). A sample of between 2,000 and 3,000 households was  
155        selected in each sector, about 32,000 total households were invited to participate in August  
156        2021 using an address list derived from United States Postal Service delivery. In addition to the  
157        sampling strata, 4 areas (Figure 1) that were based on the demographic characteristics of the  
158        community were defined and those areas were used in the analysis (Table 1). Each selected  
159        household was mailed an invitation to participate in the study in which the sampled adult (18  
160        years or older) was asked to complete an online informed consent, screening and survey  
161        questions and schedule an appointment for clinical testing. With the mailed invitations, each  
162        household of the probability sample population was provided with a unique personal  
163        identification registration code to be entered at the time of online registration, thereby  
164        allowing the investigators to differentiate between probability and convenience sampling  
165        populations. Each household was contacted multiple times to encourage participation. Public  
166        service announcements from the Louisville Mayor, Director of the Department of Public Health  
167        and Wellness, and mainstream media also publicized the research project.



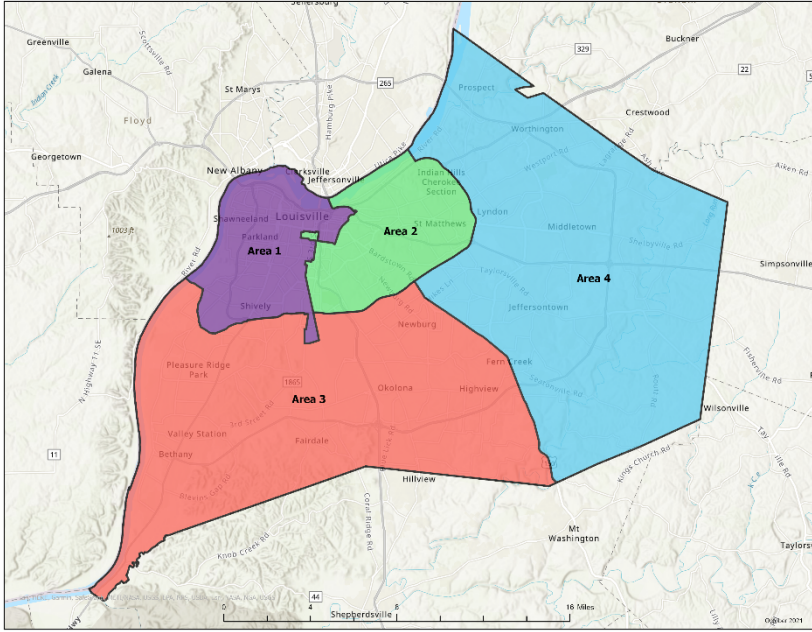

168

169 Figure 1. Studied area, Louisville/Jefferson County, Kentucky, United States.

170 Table 1. Demographic characteristics of the population surveyed.

| Area | Population          | Sex    | Race                | Age category                |                        |
|------|---------------------|--------|---------------------|-----------------------------|------------------------|
| 1    | 98,164<br>(16.49%)  | Male   | 49,860<br>(8.38%)   | White 53,644<br>(9.06%)     | 18-34 36,230 (6.09%)   |
|      |                     | Female | 48,304<br>(8.12%)   | Minority 44,520<br>(7.52%)  | 35-59 33,671 (5.66%)   |
|      |                     |        |                     |                             | 60+ 28,262 (4.75%)     |
| 2    | 98,920<br>(16.63%)  | Male   | 59,962<br>(10.07%)  | White 80,900<br>(13.66%)    | 18-34 35,679 (6%)      |
|      |                     | Female | 38,958<br>(6.55%)   | Minority 17,568<br>(2.97%)  | 35-59 17,931 (3.02%)   |
|      |                     |        |                     |                             | 60+ 41,335 (6.95%)     |
| 3    | 206,589<br>(34.73%) | Male   | 88,566<br>(14.89%)  | White 145,668<br>(24.6%)    | 18-34 118,816 (19.97%) |
|      |                     | Female | 118,023<br>(19.84%) | Minority 59,936<br>(10.13%) | 35-59 60,226 (10.12%)  |
|      |                     |        |                     |                             | 60+ 44,416 (7.46%)     |
| 4    | 191,270<br>(32.15%) | Male   | 84,390<br>(14.19%)  | White 161,889<br>(27.34%)   | 18-34 62,074 (10.43%)  |
|      |                     | Female | 106,880<br>(17.96%) | Minority 27,985<br>(4.73%)  | 35-59 59,130 (9.94%)   |
|      |                     |        |                     |                             | 60+ 42,753 (7.19%)     |

171

172 2.4. Convenience sampling

173 The convenience sample was recruited using a variety of methods including social media,  
174 community outreach with organizations and influential citizens such as clergy, and public  
175 service announcements via media organizations. For example, public officials gave press  
176 conferences to publicize the efforts and local organizations made appeals to their communities.  
177 Pre-registration as well as on-site walk-up registration were both allowed.

178

179 2.5. Weighting the sample

180 The respondents were first weighted by the inverse of the probability of selection of the  
181 household and the inverse of the number of adults in the household. The final step was raking  
182 the respondents to the number of adults in the county by: sex by age, race, and geography. To  
183 produce standard errors of the estimates, 50 jackknife replicate weights were created. These  
184 replicate weights are used to estimate the standard errors of the estimates and 95 percent  
185 confidence intervals for the estimates.

186

187 2.6. Study participants

188 A total of 1,220 sampled adults participated in the probability sample, and 981 of those  
189 responded to all six multiple choice wastewater survey questions and resided in  
190 Louisville/Jefferson County and are included in this report. A total of 2,444 adults responded in  
191 the convenience sample, and 1,751 of those responded to all six multiple choice wastewater

192 survey questions and resided in Louisville/Jefferson County are included in this report (Figure  
193 2).

194

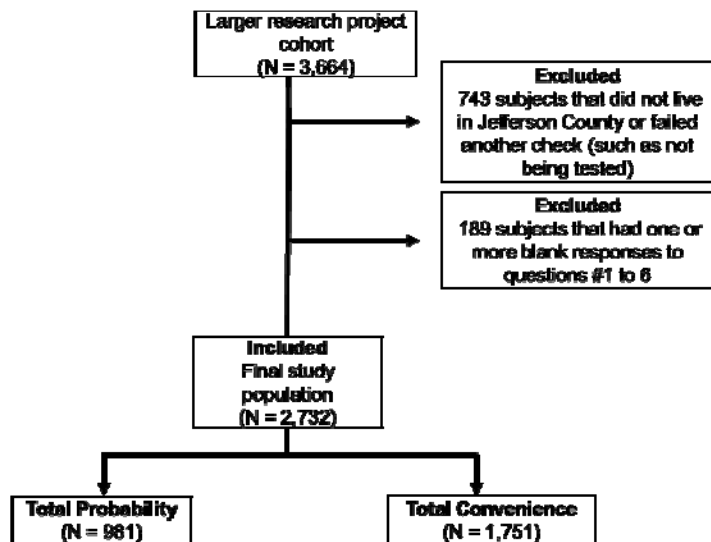

195

196 Figure 2. Studied population.

197

### 198 2.7. Data collection

199 Data were collected from August 25 to September 1, 2021.

200

### 201 2.8. Ethics

202 The University of Louisville Institutional Review Board approved this project as Human Subjects  
203 Research (IRB number: 20.0393 and 15.1260).

204

205

206 **3. Results and discussion**

207 **3.1. Random probability versus convenience sample**

208 The weighted responses from the probability and convenience samples provided estimates of  
209 the percentage of the population represented for each question. The estimates from the two  
210 samples differed substantially in several aspects (Supplement Tables B1 to B7; probability [N =  
211 981] and convenience [N = 1,751]). Even more importantly for this analysis, the responses from  
212 the probability and convenience sample groups to the questions about wastewater monitoring  
213 varied substantially. The probability respondents were 14 to 20 percentage points less likely to  
214 indicate awareness of wastewater monitoring when compared with the convenience  
215 respondents (Supplement Table B1 to B3). Due to these differences, only the weighted random  
216 probability sample data are reported in the following quantitative analysis.

217

218 **3.2. Wastewater monitoring awareness**

219 When asked ‘Can the coronavirus that causes COVID-19 be detected in the city sewer system?’,  
220 43% of respondents selected “yes”, and 49% indicated they didn’t know. More males (48%)  
221 selected “yes” than females (38%) ( $p = 0.04$ ), and generally, an even distribution of white  
222 participants (45%) and minority participants (38%) selected “yes” ( $p = 0.18$ ). When asked ‘Did  
223 you know that the amounts of the COVID virus in sewers reflect the general level of infection in  
224 the community?’, approximately one-third (34%) responded affirmatively. There was no  
225 difference in males (39%) that selected “yes” and females (30%) ( $p = 0.06$ ), or for white  
226 participants (36%) and minority participants (31%) that selected “yes” ( $p = 0.21$ ). Regarding  
227 familiarity with their wastewater utility as part of this monitoring (‘Did you know that UofL is

228 working with Louisville Metropolitan Sewer District (MSD) to test whether measurements of  
229 coronavirus in wastewater could be used to determine the risk of COVID-19 across Louisville?’),  
230 28% indicated that they knew MSD and UofL were conducting this monitoring.

231  
232 Since the start of SARS-CoV-2 wastewater monitoring, there have been nine local news updates  
233 featuring wastewater monitoring by different media outlets in Louisville/Jefferson County  
234 (Supplement C); thus, information about the activity was shared with the public. The sewer  
235 systems in the studied area are also frequently in the news as MSD is under a Consent Decree  
236 regarding a series of sewer overflow reduction projects (MSD, 2021). Additionally, a public  
237 dashboard was initiated on May 24, 2021 to share weekly data  
238 (<https://louisville.edu/envirome/thecoimmunityproject/dashboard>; University of Louisville,  
239 2021), though public engagement has been limited. And, although the national level  
240 COVIDPoops19 (2021) dashboard is available to the public, its primary audience is networking  
241 wastewater monitoring researchers.

242

243

### 244 3.3. Wastewater monitoring support and data sharing

245 The majority of respondents (85%) were supportive of wastewater sampling for public health  
246 monitoring. There was no difference in male (87%) and female (84%) participants that  
247 responded affirmatively ( $p = 0.26$ ), while minority participants (91%) were more likely to be  
248 supportive than white participants (84%) ( $p = 0.03$ ) (Figure 3). These results also underscore the  
249 disproportionate impact COVID-19 has had on minorities (Shiels et al., 2021) which may be  
250 driving these differences in support for public health monitoring. Importantly, in our study  
251 while some minority participants were neutral (9%), few were opposed (0.6%). Opinions about  
252 how data should be shared strongly supported (97%) public disclosure of the monitoring  
253 results. The views of male (98%) and female (97%) participants were similar ( $p = 0.46$ ), and,  
254 although the sample size was smaller and the result was not significantly different, minority  
255 participants were unified in terms of publicly sharing such data (99%) and had ratings higher  
256 than white participants (97%) ( $p = 0.06$ ).

257

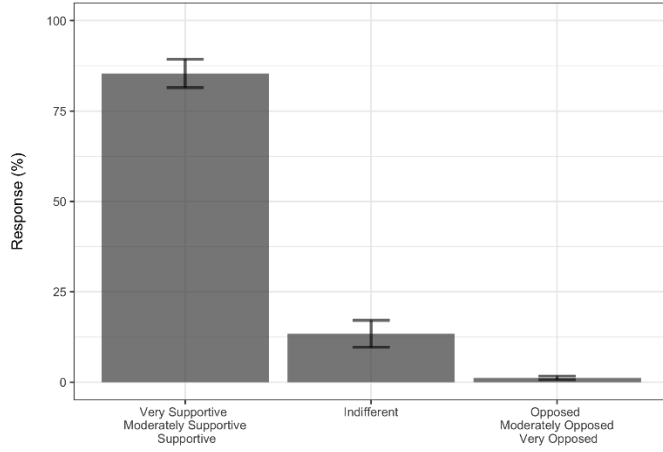

258

A

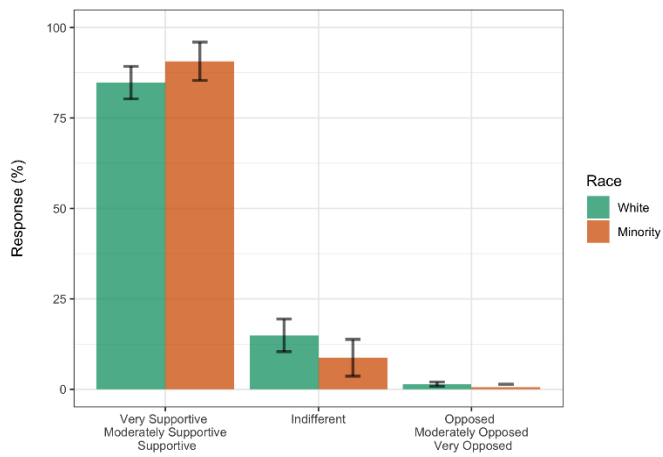

259

B

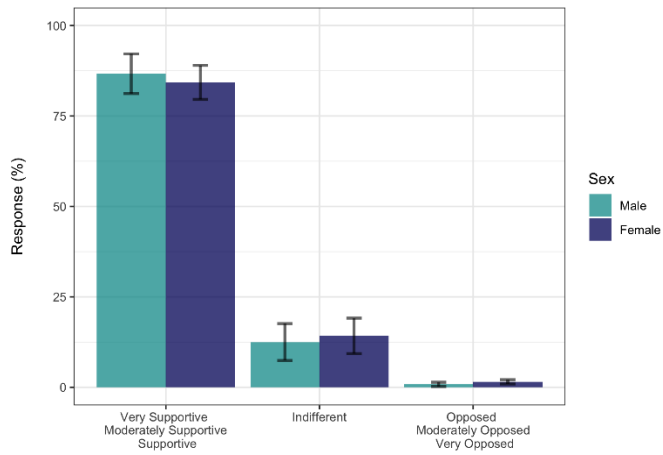

260

C

261

262 Figure 3. Weighted level of support for monitoring sewage to better understand COVID  
263 community infection levels instead of only testing people for probability samples (N = 981),  
264 Louisville/Jefferson County. Total survey response (A), by race (B) and by sex (C). Bars are 95%  
265 confidence intervals.

266

267

### 268 3.4. Size of catchment area residents believed was appropriate

269 The responses to the question about the smallest number of households respondents support  
270 being measured (ranging from >50,000 households to opposing any sized area) indicated  
271 considerable support (78%) for very large pooled sampling typically found in a community  
272 wastewater treatment plant (more than >50,000 households). The next largest group (11%)  
273 indicated support for >30,000 households. The response rate of preference for wastewater  
274 monitoring at population levels >50,000 households was not different among the four areas  
275 (Rao-Scott Chi-Square Test  $p = 0.077$ ), while the response rate of preference for community  
276 wastewater monitoring at the smallest number of households (>5,000 households) was  
277 generally lower and different (between the areas Rao-Scott Chi-Square Test  $p = 0.0008$ ) (Figure  
278 4). Area 1 encompasses western Louisville/Jefferson County and had the highest percentage of  
279 respondents that endorsed >50,000 households sized sampling areas. Conversely, area 4 had  
280 more variance across response options indicating a wider range of views. Area 3 has the largest  
281 portion of minority respondents in the overall study and a trend towards support for smaller,  
282 more targeted, sampling areas was observed. Opinion varies by location in the study area  
283 suggesting that there is no generic opinion for the city.



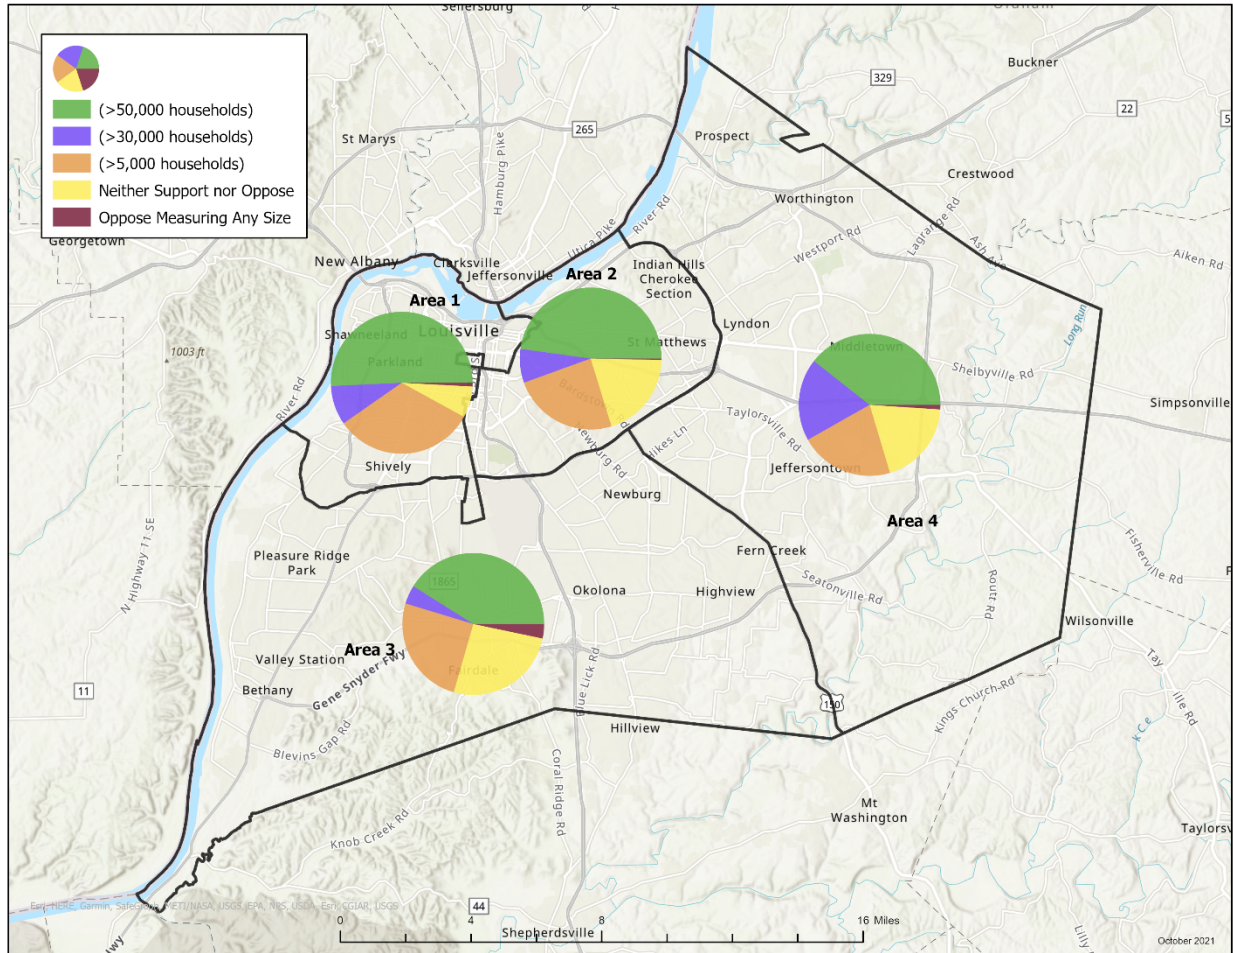

284  
 285 Figure 4. Weighted support of catchment size monitoring by geographic area for probability  
 286 samples (N = 981), Louisville/Jefferson County.

287  
 288 An interesting finding is that support for how localized the monitoring should be varied by  
 289 history of COVID-19 infection (N-IgG). Of those who had a previous infection, 42% supported  
 290 the lowest threshold of 5,000 households, whereas only 22% of those who did not have a  
 291 previous infection supported the smallest threshold (Figure 5). The geographic estimates of  
 292 prior COVID infection were also consistent with this finding (Table 1). For example, areas 1 and  
 293 2 have previous infection rate estimates almost half of those in areas 3 and 4 (10% versus

294 almost 20%). In the low infection areas 1 and 2, support for the highest threshold (>50,000  
 295 households) is 49%, whereas in areas 3 and 4, support for the highest threshold is 40% - almost  
 296 9 percentage points lower. How our findings relate to public awareness and support for use of  
 297 wastewater monitoring outside of pandemic emergency response but related an individual's  
 298 health status for pharmaceuticals, personal care products, illicit drugs, and enteroviruses needs  
 299 further study. Public opinion to surveil at the population level, and thus avoid privacy concerns,  
 300 may be the most important factor to maintain the collaborative support of public utilities for  
 301 such unregulated activities.

302

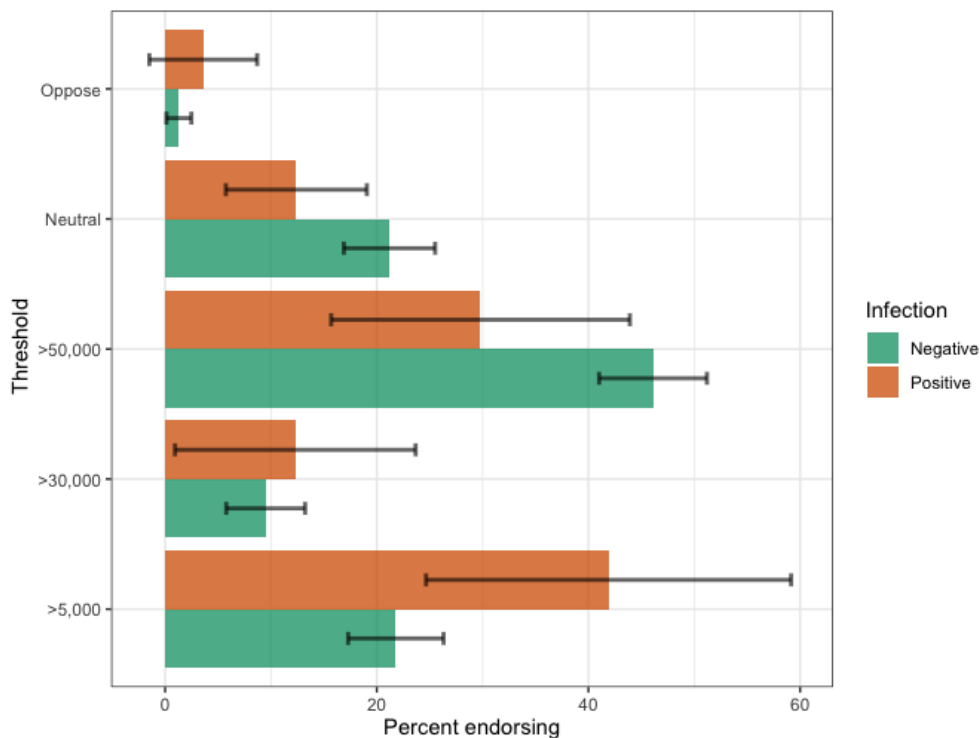

303

304 Figure 5. Weighted support of thresholds appropriate for wastewater monitoring by previous  
 305 COVID-19 infection status (N-IgG) for probability samples (N = 981), Louisville/Jefferson County.  
 306 Bars are 95% confidence intervals.

307 3.5. Qualitative feedback

308 We also asked for general feedback in an open-ended survey question. Of the random  
309 probability respondents ranked as being more aware and supportive of SARS-CoV-2 wastewater  
310 monitoring, some added the following comments:

311 *Any way to study community spread is important, especially if people aren't getting*  
312 *tested. It is a less personally invasive way of gathering that data*

313 *-female*

314

315 *If you're monitoring for COVID, then other diseases should be monitored also...*

316 *-female*

317

318 *The more measuring sites the better. I have no qualm with people gaining more*  
319 *knowledge about the health of the city. I view it no different then {than} monitoring air*  
320 *quality or school test scores. Feel free to do it although it sounds like gross work. Oh and*  
321 *thank you.*

322 *-male*

323

324 A random probability respondent ranked as being less aware and less supportive of SARS-CoV-2  
325 wastewater monitoring, added the following comment:

326 *If such monitoring of sewers was really effective, then why have I never heard of such a*  
327 *thing before? There is way too much 'false science' combined with 'false logic' going*  
328 *around worldwide in these so called modern times. As an open minded student of*

329 *science, I believe that a logic based skepticism is essential to avoid wasted time on*  
330 *useless pursuits.*

331 *-male*

332

333 Only convenience sample respondent commented about sample size stating:

334 *Concerned that measuring and reporting smaller areas could lead to biases based on*  
335 *racial, SES {socioeconomic status} or other factors. On the other hand, it could also help*  
336 *to get services to address health care disparities in particular areas. I'd want to really*  
337 *think this through if I were making a decision on this.*

338 *-female*

339

340 *As long as MSD is notifying the community that they are testing and can't pin point a*  
341 *specific house I have no problem with such testing*

342 *-male*

343

344 *Workers who come into Jefferson County can bring covid and it show up in our sewers.*  
345 *Therefore, that area might show higher covid rates but it may not be from the people*  
346 *who live in that area. Being a very mobile society can skew an area or neighborhood's*  
347 *results.*

348 *-female*

349

350 *I caution sponsors to avoid any focus on presumed areas of economic or social status. All*  
351 *results must be presented as referenced to the full community, unless specifically*  
352 *excluded in the project plan design.*

353 *-female*

354

#### 355 **4. Limitations**

356 Although our findings shed light on an understudied topic, the results have limitations. The  
357 large research cohort population (N = 3,664) was almost 90% vaccinated for COVID-19 in  
358 August, much higher than the, than the nearly 75 % adult residents who have received at  
359 minimum the first dose until October. Further, although a random probability and convenience  
360 sample were both used, a participant self-selection bias towards interest in research and public  
361 health is always possible.

362

#### 363 **5. Conclusion**

364 Wastewater monitoring has largely been accepted as part of COVID-19 pandemic emergency  
365 response and determined to be a public health surveillance method in accordance with US  
366 Department of Health and Human Services, Title 45 Code of Federal Regulations 46, Protection  
367 of Human Subjects (US Department of Health and Human Services, 2009). Despite the  
368 likelihood our participants tended to be pro-public health, awareness overall regarding  
369 wastewater surveillance was low. Our results also underscore that, in Louisville/Jefferson  
370 County, KY, the public supports wastewater monitoring and expects to see the results of such  
371 research. We found differences in race and place across the study community which has

372 implications for how communications about these initiatives could be improved and merits  
373 further study in other communities. Our study results suggest that to maintain public support  
374 for this type of sampling public utilities and public health professionals should consider a  
375 threshold of privacy concerns set around >30,000-50,000 households. That respondents who  
376 had a history of COVID-19 infection supported more localized monitoring suggests a possible  
377 psychographic factor which should be further explored that may account for difference in  
378 acceptance of public health activities. Despite sewers having been extensively used for public  
379 health monitoring through public utility commission participation during the COVID-19  
380 pandemic, the use of wastewater monitoring for SARS-CoV-2 and current views of individual  
381 versus community rights, as well as privacy and informed consent, in a pandemic guarantee the  
382 issue of public awareness and support of wastewater monitoring will see increasing interest.  
383

384 Abbreviations

385 severe acute respiratory syndrome coronavirus 2 (SARS-CoV-2)

386 Coronavirus Disease 2019 (COVID-19)

387

388 Funding

389 This study was supported, in part, by a contract with the Centers for Disease Control and

390 Prevention (GB210585). The funders had no role in study design, data collection and analysis,

391 decision to publish, or preparation of the manuscript.

392

393 Disclosure

394 The authors declare no competing financial interest.

395

396

397 **References**

- 398 Biobot Analytics, Inc., 2021. Nationwide wastewater monitoring network.  
399 <https://biobot.io/data/> (accessed 18 October 2021)
- 400 Centers for Disease Control and Prevention, 2021. National wastewater surveillance system  
401 (NWSS). [https://www.cdc.gov/healthywater/surveillance/wastewater-](https://www.cdc.gov/healthywater/surveillance/wastewater-surveillance/wastewater-surveillance.html)  
402 [surveillance/wastewater-surveillance.html](https://www.cdc.gov/healthywater/surveillance/wastewater-surveillance.html) (accessed 18 October 2021)
- 403 Coffman, M.M., Guest, J.S., Wolfe, M.K., Naughton, C.C., Boehm, A.B., Vela, J.D. and Carrera,  
404 J.S., 2021. Preventing scientific and ethical misuse of wastewater surveillance data.  
405 *Environmental science & technology*, 55(17), 11473–11475.
- 406 COVIDPoops19, 2021. Summary of global SARS-CoV-2 wastewater monitoring efforts by UC  
407 Merced researchers. <https://arcg.is/1aummW> (accessed 18 October 2021)
- 408 Gable, L., Ram, N. and Ram, J.L., 2020. Legal and ethical implications of wastewater monitoring  
409 of SARS-CoV-2 for COVID-19 surveillance. *Journal of law and the biosciences*, 7(1),  
410 p.lsa039.
- 411 Hamorsky, K.T., Bushau-Sprinkle, A.M., Kitterman, K., et al., 2021. Serological assessment of  
412 SARS-CoV-2 infection during the first wave of the pandemic in Louisville Kentucky.  
413 *Scientific reports*, 11(1), 1–12.
- 414 Hoffmann, T. and Alsing, J., 2021. Faecal shedding models for SARS-CoV-2 RNA amongst  
415 hospitalised patients and implications for wastewater-based epidemiology. medRxiv.  
416 <https://www.medrxiv.org/content/10.1101/2021.03.16.21253603v1> (accessed 18  
417 October 2021)



418 Hrudef, S.E., Silva, D.S., Shelley, J., Pons, W., Isaac-Renton, J., Chik, A.H.S. and Conant, B., 2021.  
419 Ethics guidance for environmental scientists engaged in surveillance of wastewater for  
420 SARS-CoV-2. *Environmental science & technology*, 55(13), 8484–8491.

421 Louisville Metropolitan Sewer District (MSD). Project WIN. <https://www.msprojectwin.org/>  
422 (accessed 18 October 2021)

423 Pecson, B.M., Darby, E., Haas, C.N., Amha, Y.M., Bartolo, M., Danielson, R., Dearborn, Y., Di  
424 Giovanni, G., Ferguson, C., Fevig, S. and Gaddis, E., 2021. Reproducibility and sensitivity  
425 of 36 methods to quantify the SARS-CoV-2 genetic signal in raw wastewater: findings  
426 from an interlaboratory methods evaluation in the U.S. *Environmental science: Water  
427 research & technology*, 7(3), 504–520.

428 Shiels, M.S., Haque, A.T., Haozous, E.A., Albert, P.S., Almeida, J.S., García-Closas, M., Nápoles,  
429 A.M., Pérez-Stable, E.J., Freedman, N.D. and de González, A.B., 2021. Racial and ethnic  
430 disparities in excess deaths during the COVID-19 pandemic, March to December 2020.  
431 *Annals of internal medicine*.

432 Smith, T., Cassell, G. and Bhatnagar, A., 2021, January. Wastewater surveillance can have a  
433 second act in COVID-19 vaccine distribution. *JAMA Health Forum*, 2(1), e201616-  
434 e201616.

435 United States Department of Health and Human Services, 2009. Protection of Human Subjects,  
436 Title 45 Code of Federal Regulations Part 46. United States of America.

437 University of Louisville, 2021. Wastewater monitoring results for the current week in Louisville-  
438 Jefferson County. <https://louisville.edu/envirome/thecoimmunityproject/dashboard>  
439 (accessed 18 October 2021)

440 Wu, F., Zhang, J., Xiao, A., Gu, X., Lee, W.L., Armas, F., Kauffman, K., Hanage, W., Matus, M.,  
441 Ghaeli, N. and Endo, N., 2020. SARS-CoV-2 titers in wastewater are higher than expected  
442 from clinically confirmed cases. *Msystems*, 5(4).

443 Yeager, R., Holm, R.H., Saurabh, K., Fuqua, J.L., Talley, D., Bhatnagar, A. and Smith, T., 2021.  
444 Wastewater sample site selection to estimate geographically-resolved community  
445 prevalence of COVID-19: A sampling protocol perspective. *GeoHealth*,  
446 p.e2021GH000420.

447

448 **Supplement A**

449 **Instrument: Wastewater Monitoring Community Survey**

450

451 wmc1: Can the COVID virus be detected in the city sewer system?

452 1 Yes

453 0 No

454 2 I Don't Know

455 wmc2: Did you know that the amounts of the COVID virus in sewers reflect the general level of  
456 community infection?

457 1 Yes

458 0 No

459 wmc3: Did you know that UofL works with Louisville Metropolitan Sewer District (MSD) to  
460 study whether this kind of measurement can determine health risk across Louisville?

461 1 Yes

462 0 No

463 wmc4: On a scale of 1 to 7, how much do you support monitoring sewage to better  
464 understand COVID infection levels in our community instead of only testing people?

465 1 Very Supportive

466 2 Moderately Supportive

467 3 Supportive

468 4 Indifferent

469 5 Opposed

470           6 Moderately Opposed

471           7 Very Opposed

472   wmcs5: On a scale of 1 to 7, how important is it to share what's discovered with the public?

473           1 Very Important

474           2 Moderately Important

475           3 Supportive

476           4 Indifferent

477           5 Unimportant

478           6 Moderately Unimportant

479           7 Very Unimportant

480   wmcs6: Measuring at different sewer locations can help identify patterns of infection for

481   different sized areas. Please tell us which statement best describes the smallest number of

482   households you support being measured:

483           1 Support Measuring Largest Areas

484           (>50,000 households)

485           2 Support Measuring Smaller Sections

486           (>30,000 households)

487           3 Support Measuring Neighborhoods

488           (>5,000 households)

489           4 Neither Support nor Oppose

490           5 Oppose Measuring Any Size

491 wmc7: Please share any other information you'd like about your views on monitoring sewers

492 for signs of COVID.

493 (open)

494

495 **Supplement B**  
 496 **Data Analysis**

497  
 498 Table SB 1. Percent responding to whether the coronavirus that causes COVID-19 can be  
 499 detected in the city sewer system, by sample type

500

| WMCS1      | Probability | Convenience |
|------------|-------------|-------------|
| No         | 8.6         | 6.4         |
| Yes        | 42.6        | 56.8        |
| Don't know | 48.8        | 36.7        |
| Total      | 100.0       | 100.0       |

501  
 502 Table SB 2. Percent responding to knowing that the amounts of the COVID virus in sewers  
 503 reflect the general level of infection in the community, by sample type

504

| WMCS2 | Probability | Convenience |
|-------|-------------|-------------|
| No    | 65.9        | 49.5        |
| Yes   | 34.1        | 50.5        |
| Total | 100.0       | 100.0       |

505  
 506 Table SB 3. Percent responding to knowing that UofL is working with Louisville Metropolitan  
 507 Sewer District (MSD) to test whether measurements of coronavirus in wastewater can be used  
 508 to determine the risk of COVID-19 across Louisville, by sample type

509

| WMCS3 | Probability | Convenience |
|-------|-------------|-------------|
| No    | 72.4        | 52.8        |
| Yes   | 27.6        | 47.2        |
| Total | 100.0       | 100.0       |

510  
 511 Table SB 4. Percent responding to how much do you support monitoring sewage to better  
 512 understand COVID infection levels in our community instead of only testing people, by sample  
 513 type

514

| WMCS4 | Probability | Convenience |
|-------|-------------|-------------|
| 1     | 52.2        | 61.4        |
| 2     | 11.7        | 8.1         |
| 3     | 21.5        | 14.4        |
| 4     | 13.4        | 15.0        |
| 5     | 0.5         | 0.5         |
| 6     | 0.1         | 0.1         |
| 7     | 0.6         | 0.4         |
| Total | 100.0       | 100.0       |

515

516 Table SB 5. Percent responding to how important is it to share the results of wastewater testing  
 517 with the public, by sample type  
 518

| WMCS5 | Probability | Convenience |
|-------|-------------|-------------|
| 1     | 77.8        | 81.3        |
| 2     | 11.2        | 6.8         |
| 3     | 8.4         | 6.6         |
| 4     | 0.9         | 4.4         |
| 5     | 0.8         | 0.1         |
| 6     | 0.0         | 0.0         |
| 7     | 0.9         | 0.8         |
| Total | 100.0       | 100.0       |

519  
 520 Table SB 6. Percent responding to the smallest number of households support being measured,  
 521 by sample type  
 522

| WMCS6 | Probability | Convenience |
|-------|-------------|-------------|
| 1     | 43.3        | 39.9        |
| 2     | 10.2        | 10.9        |
| 3     | 25.0        | 27.9        |
| 4     | 19.8        | 20.1        |
| 5     | 1.7         | 1.2         |
| Total | 100.0       | 100.0       |

523  
 524 Table SB 7. Percent positive for natural infection antibodies (August 2021), by sample type  
 525

| Area | Probability | Convenience |
|------|-------------|-------------|
| 1    | 6.8         | 11.8        |
| 2    | 10.2        | 14.6        |
| 3    | 21.9        | 13.0        |
| 4    | 18.2        | 10.3        |

526

527 Table SB 8. Comparison of probability (N = 981) survey results by sex  
 528

| Male   |     |         |     | Female |         |     |       |          |       |         |  |
|--------|-----|---------|-----|--------|---------|-----|-------|----------|-------|---------|--|
| WMCS1  | n   | Percent | SE  | n      | Percent | SE  | diff  | se(diff) | Z     | p-value |  |
| No     | 28  | 6.6     | 1.5 | 56     | 10.6    | 2.9 | -4.0  | 3.22     | -1.23 | 0.110   |  |
| Yes    | 212 | 48.3    | 4.5 | 274    | 38.1    | 3.7 | 10.2  | 5.87     | 1.74  | 0.041   |  |
| DK     | 160 | 45.1    | 4.0 | 251    | 51.4    | 3.6 | -6.3  | 5.43     | -1.15 | 0.125   |  |
| Total  | 400 | 100.0   |     | 581    | 100.0   |     |       |          |       |         |  |
|        |     |         |     |        |         |     |       |          |       |         |  |
| WMCS2  | n   | Percent | SE  | n      | Percent | SE  |       |          |       |         |  |
| No     | 217 | 60.8    | 4.7 | 345    | 70.0    | 3.2 | -9.2  | 5.75     | -1.60 | 0.055   |  |
| Yes    | 183 | 39.2    | 4.7 | 236    | 30.0    | 3.2 | 9.2   | 5.75     | 1.60  | 0.055   |  |
| Total  | 400 | 100.0   |     | 581    | 100.0   |     |       |          |       |         |  |
|        |     |         |     |        |         |     |       |          |       |         |  |
| WMCS3  | n   | Percent | SE  | n      | Percent | SE  |       |          |       |         |  |
| No     | 268 | 76.1    | 3.5 | 395    | 69.2    | 4.7 | 6.9   | 5.83     | 1.17  | 0.120   |  |
| Yes    | 132 | 23.9    | 3.5 | 186    | 30.8    | 4.7 | -6.9  | 5.83     | -1.17 | 0.120   |  |
| Total  | 400 | 100.0   |     | 581    | 100.0   |     |       |          |       |         |  |
|        |     |         |     |        |         |     |       |          |       |         |  |
| WMCS4  | n   | Percent | SE  | n      | Percent | SE  |       |          |       |         |  |
| 1 to 3 | 331 | 86.7    | 2.8 | 486    | 84.3    | 2.4 | 2.4   | 3.65     | 0.65  | 0.258   |  |
| 4      | 64  | 12.5    | 2.6 | 87     | 14.2    | 2.5 | -1.7  | 3.57     | -0.48 | 0.315   |  |
| 5 to 7 | 5   | 0.8     | 0.3 | 8      | 1.5     | 0.3 | -0.7  | 0.48     | -1.37 | 0.085   |  |
| Total  | 400 | 100.0   |     | 581    | 100.0   |     |       |          |       |         |  |
|        |     |         |     |        |         |     |       |          |       |         |  |
| WMCS5  | n   | Percent | SE  | n      | Percent | SE  |       |          |       |         |  |
| 1 to 3 | 385 | 97.5    | 0.8 | 568    | 97.4    | 1.3 | 0.1   | 1.48     | 0.09  | 0.463   |  |
| 4      | 9   | 1.1     | 0.5 | 7      | 0.7     | 0.5 | 0.4   | 0.70     | 0.56  | 0.289   |  |
| 5 to 7 | 6   | 1.4     | 0.7 | 6      | 1.9     | 1.1 |       |          |       |         |  |
| Total  | 400 | 100.0   |     | 581    | 100.0   |     |       |          |       |         |  |
|        |     |         |     |        |         |     |       |          |       |         |  |
| WMCS6  | n   | Percent | SE  | n      | Percent | SE  |       |          |       |         |  |
| 1      | 143 | 35.5    | 3.7 | 252    | 50.3    | 3.2 | -14.8 | 4.89     | -3.02 | 0.001   |  |
| 2      | 42  | 12.2    | 2.5 | 55     | 8.4     | 2.3 | 3.7   | 3.43     | 1.09  | 0.138   |  |
| 3      | 117 | 33.7    | 3.9 | 124    | 17.3    | 2.4 | 16.5  | 4.57     | 3.61  | 0.000   |  |
| 4      | 91  | 16.8    | 2.7 | 145    | 22.5    | 2.6 | -5.7  | 3.77     | -1.50 | 0.067   |  |
| 5      | 7   | 1.8     | 1.0 | 5      | 1.6     | 0.9 | 0.2   | 1.31     | 0.17  | 0.431   |  |
| Total  | 400 | 100.0   |     | 581    | 100.0   |     |       |          |       |         |  |

529



530 Table SB 9. Comparison of probability (N = 981) survey results by race  
 531

| White  |     |         |     | Minority |         |     |       | diff | se(diff) | Z     | p-value |
|--------|-----|---------|-----|----------|---------|-----|-------|------|----------|-------|---------|
| WMCS1  | n   | Percent | SE  | n        | Percent | SE  |       |      |          |       |         |
| No     | 68  | 6.9     | 1.3 | 15       | 14.2    | 5.1 | -7.3  | 5.27 | -1.39    | 0.083 |         |
| Yes    | 436 | 44.6    | 2.7 | 48       | 37.6    | 7.0 | 6.9   | 7.49 | 0.93     | 0.177 |         |
| DK     | 353 | 48.6    | 2.4 | 58       | 48.2    | 7.1 | 0.4   | 7.47 | 0.05     | 0.480 |         |
| Total  | 857 | 100.0   |     | 121      | 100.0   |     |       |      |          |       |         |
|        |     |         |     |          |         |     |       |      |          |       |         |
| WMCS2  | n   | Percent | SE  | n        | Percent | SE  |       |      |          |       |         |
| No     | 480 | 64.5    | 2.9 | 81       | 69.5    | 5.6 | -5.0  | 6.34 | -0.79    | 0.213 |         |
| Yes    | 377 | 35.5    | 2.9 | 40       | 30.5    | 5.6 | 5.0   | 6.34 | 0.79     | 0.213 |         |
| Total  | 857 | 100.0   |     | 121      | 100.0   |     |       |      |          |       |         |
|        |     |         |     |          |         |     |       |      |          |       |         |
| WMCS3  | n   | Percent | SE  | n        | Percent | SE  |       |      |          |       |         |
| No     | 574 | 72.7    | 3.2 | 87       | 71.7    | 5.8 | 0.9   | 6.67 | 0.14     | 0.444 |         |
| Yes    | 283 | 27.3    | 3.2 | 34       | 28.3    | 5.8 | -0.9  | 6.67 | -0.14    | 0.444 |         |
| Total  | 857 | 100.0   |     | 121      | 100.0   |     |       |      |          |       |         |
|        |     |         |     |          |         |     |       |      |          |       |         |
| WMCS4  | n   | Percent | SE  | n        | Percent | SE  |       |      |          |       |         |
| 1 to 3 | 711 | 83.8    | 2.3 | 104      | 90.7    | 2.7 | -6.9  | 3.59 | -1.93    | 0.027 |         |
| 4      | 135 | 14.9    | 2.3 | 15       | 8.7     | 2.6 | 6.1   | 3.51 | 1.75     | 0.040 |         |
| 5 to 7 | 11  | 1.4     | 0.3 | 2        | 0.6     | 0.4 | 0.8   | 0.51 | 1.53     | 0.063 |         |
| Total  | 857 | 100.0   |     | 121      | 100.0   |     |       |      |          |       |         |
|        |     |         |     |          |         |     |       |      |          |       |         |
| WMCS4  | n   | Percent | SE  | n        | Percent | SE  |       |      |          |       |         |
| 1 to 3 | 831 | 97.0    | 1.0 | 119      | 98.9    | 0.8 | -2.0  | 1.26 | -1.58    | 0.057 |         |
| 4      | 16  | 1.2     | 0.5 | 0        | .       | .   |       |      |          |       |         |
| 5 to 7 | 10  | 1.8     | 0.9 | 2        | 1.1     | 0.8 | 0.8   | 1.17 | 0.68     | 0.247 |         |
| Total  | 857 | 100.0   |     | 121      | 100.0   |     |       |      |          |       |         |
|        |     |         |     |          |         |     |       |      |          |       |         |
| WMCS6  | n   | Percent | SE  | n        | Percent | SE  |       |      |          |       |         |
| 1      | 341 | 43.0    | 2.5 | 54       | 44.3    | 6.8 | -1.3  | 7.26 | -0.19    | 0.427 |         |
| 2      | 80  | 6.9     | 1.2 | 17       | 20.4    | 6.7 | -13.5 | 6.84 | -1.98    | 0.024 |         |
| 3      | 214 | 25.5    | 2.5 | 25       | 23.4    | 7.9 | 2.1   | 8.30 | 0.25     | 0.401 |         |
| 4      | 212 | 22.5    | 2.3 | 23       | 11.2    | 3.0 | 11.3  | 3.79 | 2.99     | 0.001 |         |
| 5      | 10  | 2.0     | 0.9 | 2        | 0.6     | 0.4 | 1.4   | 0.96 | 1.50     | 0.067 |         |
| Total  | 857 | 100.0   |     | 121      | 100.0   |     |       |      |          |       |         |

532  
 533

534 Table SB 10. Comparison of probability (N = 981) survey results by area  
 535

| Area     | WMCS1 | n   | Percent | SE   |        | diff-yes | se(diff) | Z     | p-value |
|----------|-------|-----|---------|------|--------|----------|----------|-------|---------|
| <b>1</b> | No    | 6   | 10.4    | 6.4  | 1 vs 2 | -8.3     | 12.78    | -0.65 | 0.258   |
|          | Yes   | 25  | 47.9    | 10.3 | 1 vs 3 | 10.1     | 11.09    | 0.91  | 0.181   |
|          | DK    | 28  | 41.7    | 8.4  | 1 vs 4 | 9.2      | 10.98    | 0.84  | 0.200   |
|          | Total | 59  | 100.0   |      | 2 vs 3 | 18.4     | 8.68     | 2.12  | 0.017   |
| <b>2</b> | No    | 16  | 6.8     | 3.8  | 2 vs 4 | 17.5     | 8.54     | 2.05  | 0.020   |
|          | Yes   | 162 | 56.2    | 7.6  | 3 vs 4 | -0.9     | 5.70     | -0.15 | 0.440   |
|          | DK    | 81  | 37.0    | 6.2  |        |          |          |       |         |
|          | Total | 259 | 100.0   |      |        |          |          |       |         |
| <b>3</b> | No    | 21  | 8.7     | 2.1  |        |          |          |       |         |
|          | Yes   | 84  | 37.8    | 4.2  |        |          |          |       |         |
|          | DK    | 100 | 53.5    | 3.6  |        |          |          |       |         |
|          | Total | 205 | 100.0   |      |        |          |          |       |         |
| <b>4</b> | No    | 41  | 8.8     | 2.2  |        |          |          |       |         |
|          | Yes   | 215 | 38.7    | 3.9  |        |          |          |       |         |
|          | DK    | 202 | 52.5    | 4.2  |        |          |          |       |         |
|          | Total | 458 | 100.0   |      |        |          |          |       |         |

| Area     | WMCS2 | n   | Percent | SE  |        | diff-yes | se(diff) | Z     | p-value |
|----------|-------|-----|---------|-----|--------|----------|----------|-------|---------|
| <b>1</b> | No    | 39  | 70.1    | 7.8 | 1 vs 2 | -17.0    | 11.02    | -1.54 | 0.061   |
|          | Yes   | 20  | 29.9    | 7.8 | 1 vs 3 | -1.0     | 8.86     | -0.12 | 0.453   |
|          | Total | 59  | 100.0   |     | 1 vs 4 | -3.8     | 8.77     | -0.44 | 0.331   |
| <b>2</b> | No    | 115 | 53.1    | 7.8 | 2 vs 3 | 16.0     | 8.89     | 1.80  | 0.036   |
|          | Yes   | 144 | 46.9    | 7.8 | 2 vs 4 | 13.2     | 8.80     | 1.50  | 0.067   |
|          | Total | 259 | 100.0   |     | 3 vs 4 | -2.8     | 5.87     | -0.47 | 0.318   |
| <b>3</b> | No    | 137 | 69.1    | 4.2 |        |          |          |       |         |
|          | Yes   | 68  | 30.9    | 4.2 |        |          |          |       |         |
|          | Total | 205 | 100.0   |     |        |          |          |       |         |
| <b>4</b> | No    | 271 | 66.3    | 4.1 |        |          |          |       |         |
|          | Yes   | 187 | 33.7    | 4.1 |        |          |          |       |         |
|          | Total | 458 | 100.0   |     |        |          |          |       |         |

536

| Area     | WMCS3        | n   | Percent | SE  |
|----------|--------------|-----|---------|-----|
| <b>1</b> | <b>No</b>    | 41  | 62.5    | 9.9 |
|          | <b>Yes</b>   | 18  | 37.5    | 9.9 |
|          | <b>Total</b> | 59  | 100.0   |     |
| <b>2</b> | <b>No</b>    | 152 | 66.7    | 7.1 |
|          | <b>Yes</b>   | 107 | 33.3    | 7.1 |
|          | <b>Total</b> | 259 | 100.0   |     |
| <b>3</b> | <b>No</b>    | 144 | 76.0    | 4.3 |
|          | <b>Yes</b>   | 61  | 24.0    | 4.3 |
|          | <b>Total</b> | 205 | 100.0   |     |
| <b>4</b> | <b>No</b>    | 326 | 76.9    | 2.8 |
|          | <b>Yes</b>   | 132 | 23.1    | 2.8 |
|          | <b>Total</b> | 458 | 100.0   |     |

|        | diff-yes | se(diff) | Z    | p-value |
|--------|----------|----------|------|---------|
| 1 vs 2 | 4.3      | 12.22    | 0.35 | 0.364   |
| 1 vs 3 | 13.5     | 10.83    | 1.25 | 0.106   |
| 1 vs 4 | 14.4     | 10.32    | 1.40 | 0.081   |
| 2 vs 3 | 9.2      | 8.35     | 1.11 | 0.135   |
| 2 vs 4 | 10.2     | 7.68     | 1.32 | 0.093   |
| 3 vs 4 | 0.9      | 5.19     | 0.18 | 0.429   |

537

| Area     | WMCS4         | n   | Percent | SE  |
|----------|---------------|-----|---------|-----|
| <b>1</b> | <b>1 to 3</b> | 53  | 87.2    | 6.0 |
|          | <b>4</b>      | 5   | 11.9    | 5.6 |
|          | <b>5 to 7</b> | 1   | 0.9     | 0.6 |
|          | <b>Total</b>  | 59  | 100.0   |     |
| <b>2</b> | <b>1 to 3</b> | 215 | 85.9    | 3.5 |
|          | <b>4</b>      | 41  | 12.3    | 3.3 |
|          | <b>5 to 7</b> | 3   | 1.7     | 1.4 |
|          | <b>Total</b>  | 259 | 100.0   |     |
| <b>3</b> | <b>1 to 3</b> | 162 | 83.7    | 3.3 |
|          | <b>4</b>      | 39  | 15.0    | 3.4 |
|          | <b>5 to 7</b> | 4   | 1.3     | 0.7 |
|          | <b>Total</b>  | 205 | 100.0   |     |
| <b>4</b> | <b>1 to 3</b> | 387 | 86.1    | 2.4 |
|          | <b>4</b>      | 66  | 12.9    | 2.3 |
|          | <b>5 to 7</b> | 5   | 0.9     | 0.4 |
|          | <b>Total</b>  | 458 | 100.0   |     |

|        | diff-1-3 | se(diff) | Z     | p-value |
|--------|----------|----------|-------|---------|
| 1 vs 2 | 1.3      | 6.92     | 0.19  | 0.425   |
| 1 vs 3 | 3.5      | 6.83     | 0.52  | 0.302   |
| 1 vs 4 | 1.1      | 6.45     | 0.17  | 0.432   |
| 2 vs 3 | 2.2      | 4.77     | 0.47  | 0.320   |
| 2 vs 4 | -0.2     | 4.21     | -0.05 | 0.481   |
| 3 vs 4 | -2.4     | 4.06     | -0.60 | 0.274   |

538

| Area     | WMCS5         | n   | Percent | SE  |        | diff-1-3 | se(diff) | Z     | p-value |
|----------|---------------|-----|---------|-----|--------|----------|----------|-------|---------|
| <b>1</b> | <b>1 to 3</b> | 59  | 100.0   | 0.0 | 1 vs 2 | 3.2      | 1.67     | 1.93  | 0.027   |
|          | <b>4</b>      | 0   | .       | .   | 1 vs 3 | 4.7      | 1.98     | 2.38  | 0.009   |
|          | <b>5 to 7</b> | 0   | .       | .   | 1 vs 4 | 1.1      | 0.52     | 2.20  | 0.014   |
|          | <b>Total</b>  | 59  | 100.0   |     | 2 vs 3 | 1.5      | 2.59     | 0.58  | 0.281   |
| <b>2</b> | <b>1 to 3</b> | 250 | 96.8    | 1.7 | 2 vs 4 | -2.1     | 1.75     | -1.19 | 0.117   |
|          | <b>4</b>      | 4   | 1.7     | 1.4 | 3 vs 4 | -3.6     | 2.05     | -1.75 | 0.040   |
|          | <b>5 to 7</b> | 5   | 1.5     | 0.9 |        |          |          |       |         |
|          | <b>Total</b>  | 259 | 100.0   |     |        |          |          |       |         |
| <b>3</b> | <b>1 to 3</b> | 193 | 95.3    | 2.0 |        |          |          |       |         |
|          | <b>4</b>      | 7   | 1.3     | 0.6 |        |          |          |       |         |
|          | <b>5 to 7</b> | 5   | 3.4     | 1.9 |        |          |          |       |         |
|          | <b>Total</b>  | 205 | 100.0   |     |        |          |          |       |         |
| <b>4</b> | <b>1 to 3</b> | 451 | 98.9    | 0.5 |        |          |          |       |         |
|          | <b>4</b>      | 5   | 0.5     | 0.3 |        |          |          |       |         |
|          | <b>5 to 7</b> | 2   | 0.6     | 0.5 |        |          |          |       |         |
|          | <b>Total</b>  | 458 | 100.0   |     |        |          |          |       |         |

539

540

| Area     | WMCS6        | n   | Percent | SE  |
|----------|--------------|-----|---------|-----|
| <b>1</b> | <b>1</b>     | 28  | 50.8    | 9.8 |
|          | <b>2</b>     | 5   | 8.9     | 6.3 |
|          | <b>3</b>     | 18  | 32.3    | 9.5 |
|          | <b>4</b>     | 7   | 7.1     | 3.7 |
|          | <b>5</b>     | 1   | 0.9     | 0.6 |
|          | <b>Total</b> | 59  | 100.0   |     |
| <b>2</b> | <b>1</b>     | 105 | 47.8    | 6.8 |
|          | <b>2</b>     | 23  | 7.7     | 2.9 |
|          | <b>3</b>     | 69  | 24.2    | 4.6 |
|          | <b>4</b>     | 61  | 19.9    | 4.6 |
|          | <b>5</b>     | 1   | 0.3     | 0.3 |
|          | <b>Total</b> | 259 | 100.0   |     |
| <b>3</b> | <b>1</b>     | 88  | 41.1    | 4.9 |
|          | <b>2</b>     | 14  | 4.3     | 1.3 |
|          | <b>3</b>     | 38  | 25.2    | 5.3 |
|          | <b>4</b>     | 60  | 26.2    | 4.5 |
|          | <b>5</b>     | 5   | 3.3     | 1.8 |
|          | <b>Total</b> | 205 | 100.0   |     |
| <b>4</b> | <b>1</b>     | 174 | 39.4    | 3.4 |
|          | <b>2</b>     | 55  | 18.8    | 3.7 |
|          | <b>3</b>     | 116 | 21.5    | 3.4 |
|          | <b>4</b>     | 108 | 19.3    | 2.5 |
|          | <b>5</b>     | 5   | 1.0     | 0.6 |
|          | <b>Total</b> | 458 | 100.0   |     |

|        | diff-1 | se(diff) | Z    | p-value |
|--------|--------|----------|------|---------|
| 1 vs 2 | 2.9    | 11.87    | 0.25 | 0.403   |
| 1 vs 3 | 9.7    | 10.91    | 0.89 | 0.187   |
| 1 vs 4 | 11.3   | 10.33    | 1.10 | 0.136   |
| 2 vs 3 | 6.8    | 8.32     | 0.81 | 0.208   |
| 2 vs 4 | 8.4    | 7.55     | 1.12 | 0.132   |
| 3 vs 4 | 1.7    | 5.92     | 0.28 | 0.390   |

541

542

543 Table SB 11. Weighted support of catchment size monitoring with history of SARS-CoV-2  
 544 infection (N-IgG) by area for probability samples (N = 981), Louisville/Jefferson County.

| Area | Support Measuring<br>Largest Areas<br>(>50,000<br>households) |                          | Support Measuring<br>Smaller Sections<br>(>30,000<br>households) |                          | Support Measuring<br>Neighborhoods<br>(>5,000 households) |                          | Neither Support nor<br>Oppose |                          | Oppose Measuring<br>Any Size |                          |
|------|---------------------------------------------------------------|--------------------------|------------------------------------------------------------------|--------------------------|-----------------------------------------------------------|--------------------------|-------------------------------|--------------------------|------------------------------|--------------------------|
|      | Positive<br>%<br>(N-IgG)                                      | Negative<br>%<br>(N-IgG) | Positive<br>%<br>(N-IgG)                                         | Negative<br>%<br>(N-IgG) | Positive<br>%<br>(N-IgG)                                  | Negative<br>%<br>(N-IgG) | Positive<br>%<br>(N-IgG)      | Negative<br>%<br>(N-IgG) | Positive<br>%<br>(N-IgG)     | Negative<br>%<br>(N-IgG) |
| 1    | 59.0                                                          | 50.4                     | -                                                                | 9.6                      | 20.1                                                      | 33.4                     | 8.3                           | 6.6                      | 12.7                         | -                        |
| 2    | 21.9                                                          | 50.5                     | 23.9                                                             | 5.9                      | 28.7                                                      | 23.8                     | 25.5                          | 19.4                     | -                            | -                        |
| 3    | 29.8                                                          | 44.7                     | -                                                                | 4.4                      | 58.2                                                      | 16.1                     | 6.2                           | 32.2                     | 5.9                          | 2.6                      |
| 4    | 26.4                                                          | 42.3                     | 27.5                                                             | 17.0                     | 28.6                                                      | 19.8                     | 17.5                          | 19.6                     | -                            | 1.3                      |

545

546

547 **Supplement C**

548 **Wastewater Monitoring in the News, Louisville, KY**

549

- 550 1. WBRD, Louisville health officials concerned about possible spread of COVID-19 Delta  
551 variant - Jul 7, 2021 ([https://www.wdrb.com/news/louisville-health-officials-concerned-](https://www.wdrb.com/news/louisville-health-officials-concerned-about-possible-spread-of-covid-19-delta-variant/article_27a1149e-de6d-11eb-8362-0b7fe26b39e6.html)  
552 [about-possible-spread-of-covid-19-delta-variant/article\\_27a1149e-de6d-11eb-8362-](https://www.wdrb.com/news/louisville-health-officials-concerned-about-possible-spread-of-covid-19-delta-variant/article_27a1149e-de6d-11eb-8362-0b7fe26b39e6.html)  
553 [0b7fe26b39e6.html](https://www.wdrb.com/news/louisville-health-officials-concerned-about-possible-spread-of-covid-19-delta-variant/article_27a1149e-de6d-11eb-8362-0b7fe26b39e6.html))
- 554 2. WLKY, Louisville could become only city in U.S. to document herd immunity -- with help  
555 of wastewater - Apr 15, 2021 ([https://www.wlky.com/article/louisville-could-become-](https://www.wlky.com/article/louisville-could-become-only-city-in-us-to-document-herd-immunity-with-help-of-wastewater/36135716#)  
556 [only-city-in-us-to-document-herd-immunity-with-help-of-wastewater/36135716#](https://www.wlky.com/article/louisville-could-become-only-city-in-us-to-document-herd-immunity-with-help-of-wastewater/36135716#))
- 557 3. Scripps Media - University of Louisville documenting herd immunity using wastewater -  
558 May 21, 2021 ([https://www.thedenverchannel.com/news/national-politics/the-](https://www.thedenverchannel.com/news/national-politics/the-race/university-of-louisville-documenting-herd-immunity-using-wastewater)  
559 [race/university-of-louisville-documenting-herd-immunity-using-wastewater](https://www.thedenverchannel.com/news/national-politics/the-race/university-of-louisville-documenting-herd-immunity-using-wastewater))
- 560 4. WAVE3, Brazilian variant of COVID-19 found in Louisville's wastewater - May 13, 2021  
561 ([https://www.wave3.com/2021/05/13/brazilian-variant-covid-found-louisville-](https://www.wave3.com/2021/05/13/brazilian-variant-covid-found-louisville-wastewater/)  
562 [wastewater/](https://www.wave3.com/2021/05/13/brazilian-variant-covid-found-louisville-wastewater/))
- 563 5. UofL News, UofL receives \$8.6 million from the CDC for COVID-19 wastewater research -  
564 April 14, 2021 ([https://www.uoflnews.com/section/science-and-tech/uofl-receives-8-6-](https://www.uoflnews.com/section/science-and-tech/uofl-receives-8-6-million-for-covid-19-wastewater-research/)  
565 [million-for-covid-19-wastewater-research/](https://www.uoflnews.com/section/science-and-tech/uofl-receives-8-6-million-for-covid-19-wastewater-research/))
- 566 6. WDRB, California COVID-19 variant detected in Louisville - Mar 2, 2021  
567 (<https://www.wdrb.com/news/california-covid-19-variant-detected-in-louisville-as-city->

- 568 [preps-for-johnson-johnson-vaccines/article\\_a76e7b22-7b70-11eb-8992-](https://www.kentuckywaterways.com/preps-for-johnson-johnson-vaccines/article_a76e7b22-7b70-11eb-8992-a310c3dfa719.html)  
569 [a310c3dfa719.html](https://www.kentuckywaterways.com/preps-for-johnson-johnson-vaccines/article_a76e7b22-7b70-11eb-8992-a310c3dfa719.html))
- 570 7. Kentucky Waterways Alliance, Wastewater and surface water webinar - Jan 19, 2021  
571 ([https://zoom.us/rec/share/P84J7YFiHXfgVp6f\\_sDe-](https://zoom.us/rec/share/P84J7YFiHXfgVp6f_sDe-ainT_OmB7n2KAVc4dGip5xeDfQXVDS5pu5h70lMH4Rh.p7tOR7kjlrhWkxAM?fbclid=IwAR2QhC3V46RXEnhrPKd1mBUO4OgbIRXCJUKZjC0dJApxpg_4Ta2X_V_bRM)  
572 [ainT\\_OmB7n2KAVc4dGip5xeDfQXVDS5pu5h70lMH4Rh.p7tOR7kjlrhWkxAM?fbclid=IwAR](https://zoom.us/rec/share/P84J7YFiHXfgVp6f_sDe-ainT_OmB7n2KAVc4dGip5xeDfQXVDS5pu5h70lMH4Rh.p7tOR7kjlrhWkxAM?fbclid=IwAR2QhC3V46RXEnhrPKd1mBUO4OgbIRXCJUKZjC0dJApxpg_4Ta2X_V_bRM)  
573 [2QhC3V46RXEnhrPKd1mBUO4OgbIRXCJUKZjC0dJApxpg\\_4Ta2X\\_V\\_bRM](https://zoom.us/rec/share/P84J7YFiHXfgVp6f_sDe-ainT_OmB7n2KAVc4dGip5xeDfQXVDS5pu5h70lMH4Rh.p7tOR7kjlrhWkxAM?fbclid=IwAR2QhC3V46RXEnhrPKd1mBUO4OgbIRXCJUKZjC0dJApxpg_4Ta2X_V_bRM) )
- 574 8. NY Times, Watching what we flush could help keep a pandemic under control - Nov 24,  
575 2020 (<https://www.nytimes.com/2020/11/24/magazine/coronavirus-sewage.html>)
- 576 9. UofL News, MSD and UofL testing Louisville wastewater to track COVID-19 - June 18,  
577 2020 ([https://www.uoflnews.com/section/science-and-tech/msd-and-uofl-testing-](https://www.uoflnews.com/section/science-and-tech/msd-and-uofl-testing-louisville-wastewater-to-track-covid-19/)  
578 [louisville-wastewater-to-track-covid-19/](https://www.uoflnews.com/section/science-and-tech/msd-and-uofl-testing-louisville-wastewater-to-track-covid-19/) )
- 579
